# Supplementary material
Source: publisher figshare collection journal article supplement (https://acs.figshare.com/ndownloader/files/3819580)
Supplement: Supplementary file 1 [file 3819580]

## 1     **SUPPLEMENTARY DATA**

2     **S 1.1 Wine fermentation.** Table S1 shows the chemical and color characteristics of the juice  
3     and the wine as determined during the harvest seasons of 2012 and 2013. The ripeness of  
4     the grapes from the two vintages showed a large difference as reflected in the Glc + Fruc  
5     (2012: 227 g/L and 2013: 265 g/L) and total acid (2012: 5.37 g/L and 2013: 4.85 g/L) values  
6     of the juice. During the 1980s various publications advised different equations for  
7     determining the optimum ripeness of wine grapes. Using the Coombe et al.<sup>1</sup> equation (sugar  
8     concentration  $[B^{\circ}] \times pH^2$ ) the viticulturist should aim for a value between 200 and 270  
9     while Du Plessis<sup>2</sup> proposed a sugar:acid ratio ( $B^{\circ}$ : Total Acid in g/L) of four. Thus, the  
10     Pinotage harvested in 2012 meet the criteria with values of 246 and 4.2 respectively while  
11     the 2013 Pinotage would be qualified as overripe. However the current opinion of the  
12     Pinotage association ([www.pinotage.co.za](http://www.pinotage.co.za); April 2014) of South Africa recommends a  
13     minimum sugar level of 23  $B^{\circ}$  and that the optimum ripeness for the production of a “fuller  
14     style” Pinotage is at sugar levels between 24 and 26  $B^{\circ}$  with the total acid  $> 5.5$  g/L and  $pH <$   
15     3.7. Both fermentations were fermented dry ( $< 5$  g/L Glc + Fruc) after five and six days  
16     respectively with acceptable (0.3 – 0.6 g/L) volatile acidity levels. Furthermore, it is clear  
17     that the enzyme treatments did not significantly alter the chemical characteristics (pH,  
18     volatile acidity, total acidity, residual sugar and ethanol %) of the wine compared to the  
19     control wine of each vintage.

20

21     **S 1.2 Wine color results.** The wine color characteristics were measured to give an indication  
22     of the amount of anthocyanins that leached from the grape skin cells during the maceration  
23     period. This is an indirect method, in contrast to the other methods used in this article,

24 with which to determine the extent of the permeabilization that occurred in the grape skin  
25 cell wall as a result of the action of the maceration enzymes. For the analysis the wine pH  
26 was adjusted to pH 3.5 and an excess of acetaldehyde were added to eliminate the  
27 bleaching effect of SO<sub>2</sub> after which the absorbance of samples was measured at OD<sub>420</sub> and  
28 OD<sub>520</sub>. The sum of the measurements is the value for the colour density of the wine.

29 In a study<sup>3</sup> where the grape phenolics of Pinotage were compared with four other red  
30 cultivars (Merlot, Shiraz, Cabernet franc and Cabernet Sauvignon), Pinotage had the highest  
31 anthocyanin (mg/g berry) and total phenolics (mg/g berry) content of all five cultivars.  
32 When comparing the modified color densities of the wines from the different cultivars,  
33 Pinotage had the second highest value (11.65) after Shiraz (12.3), placing it in the “deep  
34 red” wine color category. The modified color density of the control wine of 2012 from this  
35 study compares well with the results from Du Toit<sup>3</sup> having a modified color density of 11.8,  
36 but in 2013 the value for the control wine was only 9.7. According to Fournand and others<sup>4</sup>  
37 some cultivars exhibit a decline in anthocyanin content near or after maturity and this can  
38 be ascribed to  $\beta$ -glycosidase and peroxidase activity.

39 For both the 2012 and 2013 vintages, treatment with maceration enzymes did not improve  
40 the color density of the resulting wines, with color densities only slightly higher, equal to, or  
41 even lower than the control fermentation. This emphasizes the value of the CoMPP method  
42 that shows the direct impact of the enzymes on the cell wall composition.

43

44

45

46   **REFERENCES**

- 47   (1)   Coombe, B. G.; Dundon, R. J.; Short, A. W. S. Indices of sugar-acidity as ripeness  
48       criteria for winegrapes. *J. Sci. Food Agric.* **1980**, *31*, 495–502.
- 49   (2)   Du Plessis, C. . Optimum maturity and quality parameters in grapes: A review. *South*  
50       *African J. Enol. Vitic.* **1984**, *5*.
- 51   (3)   Du Toit, W. Colour and phenolic characteristics of different clones of Pinot noir,  
52       Pinotage, Merlot, Shiraz, Cabernet franc and Cabernet Sauvignon. *Wynboer* **2008**,  
53       *September*.
- 54   (4)   Fournand, D.; Vicens, A.; Sidhoum, L.; Souquet, J.-M.; Moutounet, M.; Cheynier, V.  
55       Accumulation and extractability of grape skin tannins and anthocyanins at different  
56       advanced physiological stages. *J. Agric. Food Chem.* **2006**, *54*, 7331–7338.

57

58

59

60

61

62

63

64

65

66

67 **SUPPLEMENTARY TABLES AND FIGURES**

68 **Table S1.** Chemical properties of Pinotage juice (before yeast inoculation) and the resulting  
69 wine at the end of alcoholic fermentation for 2012 and 2013. Colour density (420 + 520 nm)  
70 was determined after three months of bottle aging. The values are the average of three  
71 biological repeats. Only the volatile acidity of 2012 showed a statistical significant difference  
72 between the values and they were marked with letters to indicate the differences (unpaired  
73 T-test, 95% confidence interval) between them. Fermented = wine without enzyme  
74 addition. ExCol, Expr and CB is wine fermented with the addition of Rapidase<sup>®</sup> Ex Color,  
75 Rapidase<sup>®</sup> Expression and Rapidase<sup>®</sup> CB respectively.

76

77 **Figure S1.** CoMPP results showing the effect that the fermentation has on the cell wall  
78 composition in the CDTA fraction;(A) score plot and (B) loading plot. Fresh grape skin cell  
79 walls (22.7 °B, 2012, ● black circle and 26.5°B, 2013, ● grey circle) are compared to  
80 fermented (without enzymes) (22.7 °B, 2012, ▲ black triangle and 26.5°B, 2013, ▲ grey  
81 triangle) cell walls. Xyg, xyloglucan.

82

83 **Figure S2.** The effect of maceration enzymes on the FT-MIR spectra of the skin cell walls.  
84 Similarly to Figure 7 there is an increase in cell wall proteins (exposure on surface of AIR  
85 particles) and a decrease in pectins for enzyme treated skins compared to fermented  
86 (without enzyme addition) skins. The spectra represent the average absorbance from at  
87 least five AIR samples per treatment. Control = Fermented cell wall samples without enzyme

- 88 addition, ExCol, Expr and CB = Fermented cell wall samples with the addition of
- 89 Rapidase®ExColor, -Expression and –CB respectively, 12 = 2012 and 13 = 2013.

Table S1.

|      |           | pH   |       | Volatile acidity  |       | Total Acid (g/L) |       | Gluc + Fruc (g/L) |       | Ethanol % |       | Colour density |       |
|------|-----------|------|-------|-------------------|-------|------------------|-------|-------------------|-------|-----------|-------|----------------|-------|
| 2012 | Juice     | 3.28 | ±0.02 |                   |       | 5.37             | ±0.11 | 227               | ±1.42 |           |       |                |       |
|      | Fermented | 3.39 | ±0.01 | 0.43 <sup>a</sup> | ±0.03 | 6.59             | ±0.09 | 1.30              | ±0.14 | 14.32     | ±0.12 | 11.76          | ±1.09 |
|      | ExCol     | 3.35 | ±0.04 | 0.45 <sup>a</sup> | ±0.04 | 6.87             | ±0.29 | 1.29              | ±0.02 | 14.07     | ±0.38 | 12.39          | ±0.65 |
|      | Expr      | 3.40 | ±0.02 | 0.50 <sup>b</sup> | ±0.01 | 6.60             | ±0.14 | 1.30              | ±0.11 | 14.15     | ±0.10 | 12.34          | ±0.68 |
|      | CB        | 3.40 | ±0.01 | 0.47 <sup>a</sup> | ±0.03 | 6.62             | ±0.12 | 1.28              | ±0.06 | 14.38     | ±0.19 | 12.33          | ±0.97 |
| 2013 | Juice     | 3.71 | ±0.07 |                   |       | 4.85             | ±0.20 | 265               | ±0.96 |           |       |                |       |
|      | Fermented | 3.71 | ±0.04 | 0.24              | ±0.04 | 4.47             | ±0.19 | 3.51              | ±0.60 | 14.55     | ±0.49 | 9.66           | ±1.74 |
|      | ExCol     | 3.63 | ±0.07 | 0.25              | ±0.02 | 4.64             | ±0.15 | 3.12              | ±0.54 | 13.36     | ±1.60 | 8.78           | ±1.71 |
|      | Expr      | 3.75 | ±0.04 | 0.32              | ±0.04 | 4.47             | ±0.16 | 3.71              | ±0.38 | 14.21     | ±0.48 | 9.61           | ±0.71 |
|      | CB        | 3.74 | ±0.04 | 0.32              | ±0.03 | 4.44             | ±0.10 | 3.03              | ±0.68 | 13.93     | ±0.90 | 9.57           | ±0.72 |

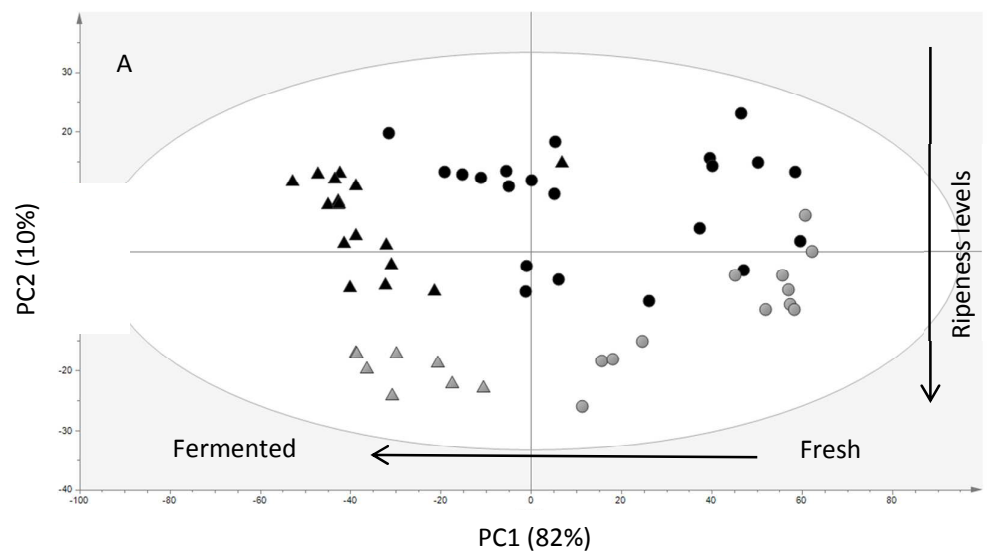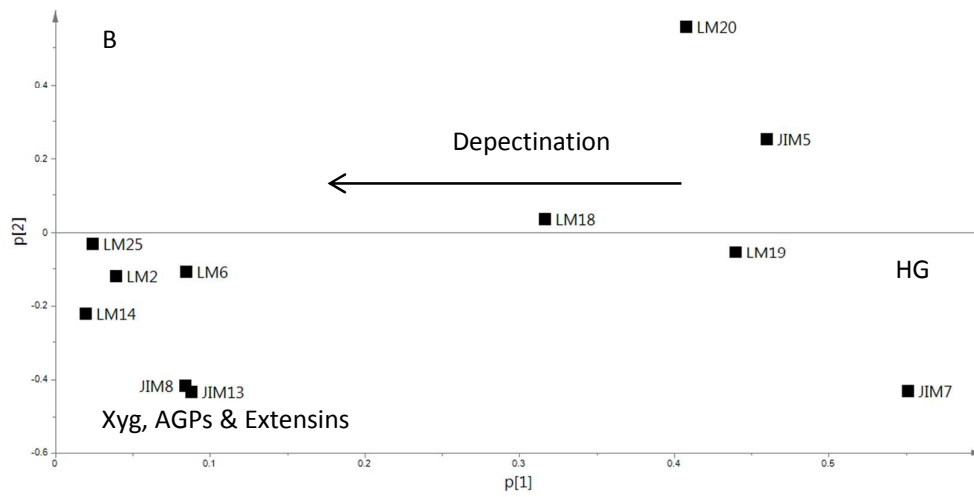

**Figure S1**

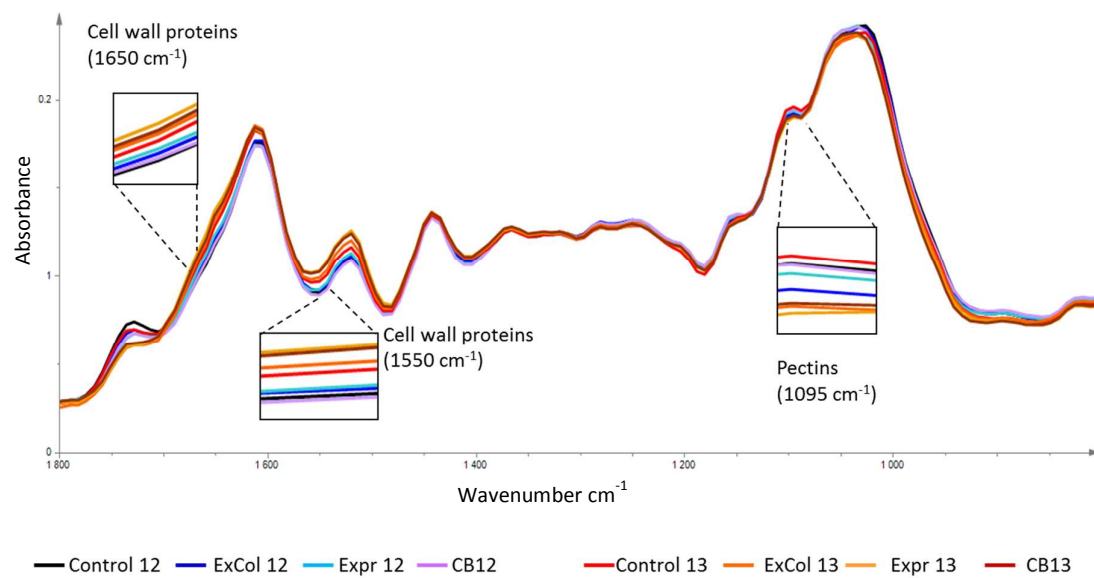

**Figure S2.**
